# Supplementary material for: The Schistosomiasis SpleenOME: Unveiling the Proteomic Landscape of Splenomegaly Using Label-Free Mass Spectrometry
Source: Front Immunol. 2019 Jan 22;9:3137. doi: 10.3389/fimmu.2018.03137 (PMC6352917; doi:10.3389/fimmu.2018.03137)
Supplement: Supplementary Table 3 — Set of uniquely identified proteins in spleen cells after 7 weeks of S. mansoni infection and in Control individuals. [file Table_3.xlsx]

## Sheet: Hoja1
Proteins exclusively identified in mice spleen cells after 7 weeks of Schistosoma mansoni infection
UniprotKB ID	Gene Name (Symbol ID)	Spectrum Count	NSAF	Coverage	Mol. Wt.
A0A0A6YW14	immunoglobulin heavy constant delta(Ighd)	6	0.000169815	0.1237	32411.3
A0A0A6YXL3	ribosomal protein L31(Rpl31)	4	0.000378669	0.1954	9917.5
A0A0G2JFX7	RNA binding motif protein 8a(Rbm8a)	8	0.000385312	0.1754	19113.1
A0A0J9YUL3	septin 11(Sept11)	6	0.00011439	0.0856	49732.3
A0A0R4J0B2	phospholipase B domain containing 1(Plbd1)	4	5.99e-05	0.0382	62959.7
A0A0R4J170	SWI/SNF related, matrix associated, actin dependent regulator of chromatin, subfamily a, member 4(Smarca4)	7	3.57e-05	0.0464	181725
A0A0R4J1E2	eukaryotic translation elongation factor 1 delta (guanine nucleotide exchange protein)(Eef1d)	16	0.000199662	0.1379	72867.6
A0A0R4J2C3	DEAH (Asp-Glu-Ala-His) box polypeptide 9(Dhx9)	16	0.000287095	0.1394	50974.5
A0A0U1RP68	isocitrate dehydrogenase 2 (NADP+), mitochondrial(Idh2)	8	0.000439256	0.32	16668.5
A0A140LIM5	BUB3 mitotic checkpoint protein(Bub3)	6	0.000268567	0.1467	20822.3
A0A140LJF4	protein arginine N-methyltransferase 1(Prmt1)	10	0.000426738	0.1917	22412.5
A0A140T8K8	ribosomal protein L13, pseudogene 3(Rpl13-ps3)	20	0.000795753	0.2705	23975.3
A1BN54	actinin, alpha 1(Actn1)	82	0.000761393	0.3923	102637
A2A813	Parkinson disease (autosomal recessive, early onset) 7(Park7)	24	0.00112951	0.4571	18444.5
A2A816	Parkinson disease (autosomal recessive, early onset) 7(Park7)	15	0.000988326	0.296	12713.5
A2ALF0	DnaJ heat shock protein family (Hsp40) member C8(Dnajc8)	8	0.00030086	0.1416	25801.3
A2ALT5	S-adenosylhomocysteine hydrolase(Ahcy)	8	0.000693562	0.3579	10102.2
A2CF88	arachidonate 15-lipoxygenase(Alox15)	43	0.000534163	0.2926	75378.1
B1ARA5	ribosomal protein L26(Rpl26)	20	0.0011519	0.2727	17002.4
B1AU75	nuclear autoantigenic sperm protein (histone-binding)(Nasp)	9	9.59e-05	0.0776	83943.7
B1AUY3	Rho GTPase activating protein 4(Arhgap4)	5	4.27e-05	0.0218	107518
B2M1R6	heterogeneous nuclear ribonucleoprotein K(Hnrnpk)	80	0.00149746	0.5273	48514.2
B2RPS1	RAB5B, member RAS oncogene family(Rab5b)	7	0.00026815	0.1581	23673.9
B2RRX1	actin, beta(Actb)	493	0.0108277	0.7333	41691.7
B7ZCF1	proteasome (prosome, macropain) 26S subunit, ATPase 3(Psmc3)	9	0.000164356	0.1353	50345.8
B7ZNL2	nucleosome assembly protein 1-like 4(Nap1l4)	15	0.000320054	0.2642	43889.4
D3YVN7	Tu translation elongation factor pseudogene(Gm9755)	24	0.000437312	0.323	49489
D3YW43	heat shock protein 8(Hspa8)	37	0.0019287	0.5506	17414
D3YX79	proteasome zeta chain(Gm8394)	14	0.000478443	0.249	26367.2
D3YXG6	actin related protein 2/3 complex, subunit 2(Arpc2)	36	0.00104401	0.3415	32474.4
D3YYR4	hexokinase 1(Hk1)	2	8.95e-05	0.0652	20748.8
D3Z0L4	coiled-coil-helix-coiled-coil-helix domain containing 3(Chchd3)	6	0.000257377	0.1198	22420.3
D3Z0M9	DEAD (Asp-Glu-Ala-Asp) box polypeptide 23(Ddx23)	5	5.03e-05	0.0427	95417.9
D3Z312	tumor necrosis factor, alpha-induced protein 8(Tnfaip8)	2	7.77e-05	0.0943	24313.6
D3Z4V1	pleiotropic regulator 1(Plrg1)	8	0.000130731	0.1012	56006.6
D3Z5I1	zinc finger CCCH type, antiviral 1(Zc3hav1)	2	1.65e-05	0.0141	112443
D3Z629	ribosomal protein L9(Rpl9)	13	0.000644992	0.3133	19061.3
D6RCG1	phosphoribosylglycinamide formyltransferase(Gart)	5	0.000134576	0.1144	32078.1
D6RE43	ribosomal protein L10A(Rpl10a)	5	0.000710004	0.2759	6811.7
E0CX20	BUD31 homolog(Bud31)	4	0.000228779	0.1458	16970.6
E9PUX4	ribosomal protein L6-like(Rpl6l)	45	0.0012521	0.4088	33551.9
E9PVX6	antigen identified by monoclonal antibody Ki 67(Mki67)	7	1.81e-05	0.0113	350632
E9PX27	heat shock protein 90 alpha (cytosolic), class B member 1(Hsp90ab1)	28	0.00205901	0.3393	12931.7
E9PY39	NA	3	6.66e-05	0.027	42051.4
E9PZ00	prosaposin(Psap)	6	8.97e-05	0.0653	60613.9
E9Q1Y9	keratin 83(Krt83)	4	6.88e-05	0.0647	52757.4
E9Q5C9	nucleolar and coiled-body phosphoprotein 1(Nolc1)	6	7.04e-05	0.0556	73636.3
E9Q6E5	serine/arginine-rich splicing factor 11(Srsf11)	6	9.67e-05	0.09	56645.9
E9Q6P2	protein phosphatase 3, catalytic subunit, beta isoform(Ppp3cb)	4	6.63e-05	0.0423	56044
E9Q7L0	oxoglutarate dehydrogenase-like(Ogdhl)	9	7.2e-05	0.036	116508
E9Q9F5	septin 7(Sept7)	21	0.000395783	0.2906	50630.9
E9QAX7	chromosome segregation 1-like (S. cerevisiae)(Cse1l)	9	0.000178613	0.1566	47961.3
E9QNP0	KxDL motif containing 1(Kxd1)	118	0.00418902	0.2716	26821
E9QNR6	expressed sequence AI837181(AI837181)	1	2.76e-05	0.0369	31807.9
F2Z494	myosin, heavy polypeptide 9, non-muscle(Myh9)	15	0.00102951	0.6333	13551.9
F6Q609	chaperonin containing Tcp1, subunit 3 (gamma)(Cct3)	16	0.00042924	0.342	34391.8
F6QA74	apurinic/apyrimidinic endonuclease 1(Apex1)	13	0.00037048	0.3356	32280.6
F6RJ39	apoptotic chromatin condensation inducer 1(Acin1)	10	6.47e-05	0.048	143550
F6SVV1	predicted gene 9493(Gm9493)	29	0.00124399	0.5104	21851.2
F6SXM5	Sjogren syndrome antigen B(Ssb)	14	0.000501325	0.1957	26241.7
F6USD5	mesencephalic astrocyte-derived neurotrophic factor(Manf)	7	0.000476466	0.3223	13723.1
F6VW30	tyrosine 3-monooxygenase/tryptophan 5-monooxygenase activation protein, theta polypeptide(Ywhaq)	38	0.0010329	0.3366	34309.5
F6WL90	nuclear antigen Sp100(Sp100)	11	0.000299989	0.1689	35788.8
F6XGN0	nucleoporin 210(Nup210)	19	0.000145432	0.0994	115936
F6ZV59	heterogeneous nuclear ribonucleoprotein D(Hnrnpd)	28	0.00106764	0.3981	24690.6
F7AXP1	polypyrimidine tract binding protein 1(Ptbp1)	15	0.000762597	0.2654	16475.2
F8WHU5	PDS5 cohesin associated factor B(Pds5b)	4	2.27e-05	0.0352	164639
G3UVU2	splicing factor 3a, subunit 2(Sf3a2)	2	3.4e-05	0.0536	51228.4
G3UXW9	G protein pathway suppressor 1(Gps1)	2	3.13e-05	0.0209	58805.7
G3UYH2	proteasome (prosome, macropain) 26S subunit, non-ATPase, 11(Psmd11)	5	0.000197035	0.1292	23630.3
G3UZD3	RAB11B, member RAS oncogene family(Rab11b)	15	0.000640107	0.3005	21740
G3UZZ3	dynamin 2(Dnm2)	10	0.000102058	0.0595	91598.8
G3X956	suppressor of Ty 16(Supt16)	16	0.000125861	0.0974	119745
G3X9V0	proteasome (prosome, macropain) activator subunit 2 (PA28 beta)(Psme2)	22	0.000784386	0.3939	26124.7
G5E8G0	heterogeneous nuclear ribonucleoprotein D(Hnrnpd)	28	0.000803517	0.2997	30571.1
H3BL56	ras homolog family member C(Rhoc)	35	0.00193464	0.5168	17021.7
I7HPY0	SH3 domain binding glutamic acid-rich protein-like 3(Sh3bgrl3)	4	0.000890384	0.2703	4192.1
J3QNW0	DNA methyltransferase (cytosine-5) 1(Dnmt1)	9	4.94e-05	0.0293	169832
O08784	treacle ribosome biogenesis factor 1(Tcof1)	28	0.000174704	0.1182	134903
O08807	peroxiredoxin 4(Prdx4)	7	0.00021041	0.0657	31015.1
O09159	mannosidase 2, alpha B1(Man2b1)	7	5.69e-05	0.0484	114558
O35143	ATPase inhibitory factor 1(Atpif1)	2	0.000155397	0.0849	12133.2
O35643	adaptor protein complex AP-1, beta 1 subunit(Ap1b1)	14	0.000122274	0.087	103851
O35685	nudC nuclear distribution protein(Nudc)	4	9.92e-05	0.0602	38316.3
P01868	immunoglobulin heavy constant gamma 1 (G1m marker)(Ighg1)	9	0.000228779	0.1265	35663.7
P01872	immunoglobulin heavy constant mu(Ighm)	57	0.00103404	0.2996	49922.3
P08032	spectrin alpha, erythrocytic 1(Spta1)	5	1.71e-05	0.0174	279675
P08775	polymerase (RNA) II (DNA directed) polypeptide A(Polr2a)	6	2.51e-05	0.0208	217021
P14430	histocompatibility 2, Q region locus 8(H2-Q8)	4	0.000101056	0.0307	37368.7
P17426	adaptor-related protein complex 2, alpha 1 subunit(Ap2a1)	2	1.69e-05	0.0215	107578
P18654	ribosomal protein S6 kinase polypeptide 3(Rps6ka3)	4	4.45e-05	0.0284	83622.9
P19096	fatty acid synthase(Fasn)	10	3.29e-05	0.0371	272239
P20029	heat shock protein 5(Hspa5)	113	0.00142088	0.4336	72359.5
P25206	minichromosome maintenance complex component 3(Mcm3)	18	0.000182572	0.1675	91471.2
P25799	nuclear factor of kappa light polypeptide gene enhancer in B cells 1, p105(Nfkb1)	2	1.7e-05	0.0268	105531
P25976	upstream binding transcription factor, RNA polymerase I(Ubtf)	9	9.69e-05	0.1111	89435.2
P27612	phospholipase A2, activating protein(Plaa)	6	6.22e-05	0.0579	87147.6
P29391	ferritin light polypeptide 1(Ftl1)	3	0.000135017	0.1311	20771.5
P29452	caspase 1(Casp1)	2	4.1e-05	0.0473	45593.2
P30355	arachidonate 5-lipoxygenase activating protein(Alox5ap)	7	0.000358089	0.1739	18106.4
P32883	Kirsten rat sarcoma viral oncogene homolog(Kras)	10	0.00043577	0.1164	21624
P35441	thrombospondin 1(Thbs1)	14	9.86e-05	0.0632	129546
P42208	septin 2(Sept2)	7	0.000159702	0.2216	41481.3
P47811	mitogen-activated protein kinase 14(Mapk14)	1	2.29e-05	0.0417	41442.9
P48771	cytochrome c oxidase subunit VIIa 2(Cox7a2)	3	0.000297688	0.1205	9267
P50429	arylsulfatase B (Arsb)	3	4.63e-05	0.0805	59591
P53986	solute carrier family 16 (monocarboxylic acid transporters), member 1(Slc16a1)	1	1.67e-05	0.0264	53214.4
P54775	proteasome (prosome, macropain) 26S subunit, ATPase, 4(Psmc4)	6	0.000118221	0.055	47360.6
P56371	RAB4A, member RAS oncogene family(Rab4a)	1	3.78e-05	0.0642	24375.2
P56399	ubiquitin specific peptidase 5 (isopeptidase T)(Usp5)	13	0.000124789	0.1026	95754.3
P59708	splicing factor 3B, subunit 6(Sf3b6)	2	0.000131777	0.096	14557.5
P61087	ubiquitin-conjugating enzyme E2K(Ube2k)	10	0.000411802	0.33	22374.6
P61957	small ubiquitin-like modifier 2(Sumo2)	12	0.00104034	0.2947	10846.4
P61965	WD repeat domain 5(Wdr5)	5	0.000123294	0.0928	36547.4
P62196	protease (prosome, macropain) 26S subunit, ATPase 5(Psmc5)	6	0.000121715	0.0862	45579
P62305	small nuclear ribonucleoprotein E(Snrpe)	5	0.000447611	0.4457	10778.6
P62843	ribosomal protein S15(Rps15)	3	0.000170401	0.3655	17011.2
P62869	transcription elongation factor B (SIII), polypeptide 2(Tceb2)	6	0.000418782	0.3559	13143.6
P63328	protein phosphatase 3, catalytic subunit, alpha isoform(Ppp3ca)	4	6.32e-05	0.0557	58588.3
P70697	uroporphyrinogen decarboxylase(Urod)	2	4.49e-05	0.0872	40647.9
P83882	ribosomal protein L36A(Rpl36a)	4	0.000310794	0.0943	12414.8
P84084	ADP-ribosylation factor 5(Arf5)	22	0.00100663	0.4778	20498.6
P97310	minichromosome maintenance complex component 2(Mcm2)	16	0.000145771	0.1228	101995
P97855	GTPase activating protein (SH3 domain) binding protein 1(G3bp1)	13	0.000230255	0.129	51778.9
Q04207	v-rel reticuloendotheliosis viral oncogene homolog A (avian)(Rela)	2	3e-05	0.0601	60156.2
Q05D44	eukaryotic translation initiation factor 5B(Eif5b)	6	4.06e-05	0.0255	137514
Q09200	beta-1,4-N-acetyl-galactosaminyl transferase 1(B4galnt1)	1	1.55e-05	0.0206	59157.1
Q0VGU0	secretion associated Ras related GTPase 1B(Sar1b)	4	0.000166385	0.1566	22349.5
Q14A47	translational machinery associated 7(Tma7)	9	0.00115819	0.4375	7043.9
Q14AC7	ADP-ribosylation factor-like 1(Arl1)	1	4.55e-05	0.0608	20380.5
Q1HFZ0	NOL1/NOP2/Sun domain family member 2(Nsun2)	7	7.62e-05	0.0898	85379.2
Q3TAL2	secretory carrier membrane protein 2(Scamp2)	3	7.51e-05	0.0365	36423.2
Q3TBA3	transporter 1, ATP-binding cassette, sub-family B (MDR/TAP)(Tap1)	13	0.000153834	0.1466	75892.3
Q3TC45	S100 calcium binding protein A10 (calpactin)(S100a10)	3	0.000254723	0.1753	11160.5
Q3TK95	eukaryotic translation initiation factor 4E(Eif4e)	5	0.000189771	0.1429	25019.5
Q3TM89	PEST proteolytic signal containing nuclear protein(Pcnp)	3	0.000168083	0.1837	15533.9
Q3TS02	ATP citrate lyase(Acly)	7	0.000117418	0.0754	53653.7
Q3TUQ5	pinin(Pnn)	5	5.67e-05	0.0441	82437.4
Q3TW96	UDP-N-acteylglucosamine pyrophosphorylase 1-like 1(Uap1l1)	2	3.25e-05	0.0355	56559.7
Q3U1V3	G protein-coupled receptor kinase 2(Grk2)	3	3.59e-05	0.0232	79569.5
Q3UCC5	PEST proteolytic signal containing nuclear protein(Pcnp)	4	0.00018508	0.2247	18933.4
Q3UDM0	MOB kinase activator 1B(Mob1b)	4	0.000149069	0.1041	25574.9
Q3UG16	adaptor-related protein complex AP-1, mu subunit 1(Ap1m1)	12	0.000233647	0.1773	48494
Q3UGX2	spectrin beta, erythrocytic(Sptb)	4	1.41e-05	0.0086	267907
Q3UHY8	ATP-binding cassette, sub-family E (OABP), member 1(Abce1)	7	9.62e-05	0.1219	67253
Q3UJ36	actin, gamma 2, smooth muscle, enteric(Actg2)	224	0.00490658	0.3963	41831.8
Q3UJQ9	3-oxoacid CoA transferase 1(Oxct1)	10	0.000169466	0.1502	52227.1
Q3ULJ0	glycerol-3-phosphate dehydrogenase 1-like(Gpd1l)	5	0.000117323	0.0741	38182.9
Q3V117	ATP citrate lyase(Acly)	15	0.000112208	0.0917	120700
Q4VAF2	ribosomal protein L37a(Rpl37a)	11	0.000984745	0.4565	10250.5
Q542I8	integrin beta 2(Itgb2)	50	0.000534808	0.3675	84819.9
Q542J9	proliferating cell nuclear antigen(Pcna)	23	0.000725782	0.3027	28748.3
Q542P4	membrane protein, palmitoylated(Mpp1)	1	1.77e-05	0.0258	52176.4
Q544R7	heme oxygenase 2(Hmox2)	1	2.61e-05	0.0571	35697.9
Q545I6	cathepsin Z(Ctsz)	7	0.000188406	0.1078	33956.2
Q548T0	syntaxin binding protein 2(Stxbp2)	4	5.56e-05	0.0506	66297.5
Q561N5	ribosomal protein S18(Rps18)	27	0.00146298	0.5395	17689.8
Q569Z5	DEAD (Asp-Glu-Ala-Asp) box polypeptide 46(Ddx46)	5	3.99e-05	0.0329	117358
Q58E59	splicing factor 3a, subunit 3(Sf3a3)	3	4.93e-05	0.024	58787.2
Q5DQR4	syntaxin binding protein 5-like(Stxbp5l)	2	1.39e-05	0.0093	131742
Q5I2A0	serine (or cysteine) peptidase inhibitor, clade A, member 3G(Serpina3g)	4	7.49e-05	0.0864	48972.2
Q5M9M5	ribosomal protein L23A(Rpl23a)	16	0.000844723	0.2821	17666.1
Q5SWN2	replication protein A1(Rpa1)	10	0.000127889	0.1102	71350.8
Q60676	protein phosphatase 5, catalytic subunit(Ppp5c)	1	1.65e-05	0.0261	56822.2
Q60766	immunity-related GTPase family M member 1(Irgm1)	6	0.000120822	0.1418	46504
Q60790	RAS p21 protein activator 3(Rasa3)	2	1.98e-05	0.048	95908.4
Q60875	rho/rac guanine nucleotide exchange factor (GEF) 2(Arhgef2)	1	8.36e-06	0.0152	111887
Q60931	voltage-dependent anion channel 3(Vdac3)	23	0.000669361	0.3958	30715.4
Q61033	thymopoietin(Tmpo)	28	0.00102493	0.5378	24957.1
Q61035	histidyl-tRNA synthetase(Hars)	8	0.000129447	0.0943	57378.1
Q61093	cytochrome b-245, beta polypeptide(Cybb)	12	0.00017339	0.1316	65244.3
Q61152	protein tyrosine phosphatase, non-receptor type 18(Ptpn18)	4	7.27e-05	0.0751	50152.4
Q61937	nucleophosmin 1(Npm1)	48	0.00135387	0.5205	32521.8
Q62189	small nuclear ribonucleoprotein polypeptide A(Snrpa)	9	0.000258273	0.115	31796.5
Q62507	cochlin(Coch)	1	1.49e-05	0.0199	59893.6
Q63850	nucleoporin 62(Nup62)	1	1.57e-05	0.0266	53204.4
Q64514	tripeptidyl peptidase II(Tpp2)	6	3.92e-05	0.0571	139772
Q64525	histone cluster 2, H2bb(Hist2h2bb)	269	0.0175833	0.5873	13893.6
Q66JS6	eukaryotic translation initiation factor 3, subunit J2(Eif3j2)	5	0.000156579	0.0875	29449.6
Q68FL4	S-adenosylhomocysteine hydrolase-like 2(Ahcyl2)	1	1.34e-05	0.0196	66838.6
Q6A026	PDS5 cohesin associated factor A(Pds5a)	5	3.09e-05	0.0173	150214
Q6DID3	SR-related CTD-associated factor 8(Scaf8)	3	1.95e-05	0.0095	139468
Q6GT24	peroxiredoxin 6(Prdx6)	27	0.000992738	0.558	24793
Q6P542	ATP-binding cassette, sub-family F (GCN20), member 1(Abcf1)	3	2.95e-05	0.0227	94868.9
Q6PB66	leucine-rich PPR-motif containing(Lrpprc)	3	1.78e-05	0.018	156498
Q6PHQ9	poly(A) binding protein, cytoplasmic 4(Pabpc4)	12	0.000149746	0.0894	72178.7
Q6URW6	myosin, heavy polypeptide 14(Myh14)	13	5.27e-05	0.0197	231463
Q6ZWQ7	signal peptidase complex subunit 3 homolog (S. cerevisiae)(Spcs3)	6	0.000274535	0.1778	20282.5
Q78XF5	oligosaccharyltransferase complex subunit (non-catalytic)(Ostc)	2	0.000110551	0.0805	16785.8
Q80UU9	progesterone receptor membrane component 2(Pgrmc2)	6	0.000227725	0.1014	23301.6
Q80XR5	U2 small nuclear ribonucleoprotein auxiliary factor (U2AF) 2(U2af2)	15	0.000262295	0.1465	53069
Q810A7	DEAD (Asp-Glu-Ala-Asp) box polypeptide 42(Ddx42)	2	1.77e-05	0.0355	101884
Q8BG05	heterogeneous nuclear ribonucleoprotein A3(Hnrnpa3)	68	0.00147771	0.3668	39609.6
Q8BGY2	eukaryotic translation initiation factor 5A2(Eif5a2)	13	0.000699795	0.2941	16764.2
Q8BH43	WAS protein family, member 2(Wasf2)	3	4.97e-05	0.0262	54021.9
Q8BMA6	signal recognition particle 68(Srp68)	4	5.27e-05	0.0528	70512.3
Q8BML9	glutaminyl-tRNA synthetase(Qars)	3	3.19e-05	0.0413	87602.9
Q8BTM8	filamin, alpha(Flna)	233	0.000724971	0.459	281028
Q8BU30	isoleucine-tRNA synthetase(Iars)	5	3.26e-05	0.0261	144161
Q8BU31	RAP2C, member of RAS oncogene family(Rap2c)	1	4.5e-05	0.0601	20713.4
Q8BVG4	dipeptidylpeptidase 9(Dpp9)	1	9.55e-06	0.0244	97920.9
Q8BWY3	eukaryotic translation termination factor 1(Etf1)	7	0.000131928	0.0709	48982.1
Q8C0L0	thioredoxin-related transmembrane protein 4(Tmx4)	2	4.92e-05	0.0925	37089.8
Q8C253	lectin, galactose binding, soluble 3(Lgals3)	11	0.000343169	0.1856	27379.5
Q8C2K5	RAS protein activator like 3(Rasal3)	1	7.9e-06	0.0115	114595
Q8C2Q3	RNA binding motif protein 14(Rbm14)	16	0.000196976	0.1465	69388
Q8CAQ8	inner membrane protein, mitochondrial(Immt)	14	0.00016263	0.1185	78660.7
Q8CG29	myosin IF(Myo1f)	4	3e-05	0.0437	125117
Q8JZM7	cell division cycle 73, Paf1/RNA polymerase II complex component(Cdc73)	2	3.1e-05	0.0188	60521.1
Q8K1M6	dynamin 1-like(Dnm1l)	2	2.22e-05	0.0377	82588.5
Q8K2C9	3-hydroxyacyl-CoA dehydratase 3(Hacd3)	2	4.55e-05	0.058	43085.4
Q8R010	aminoacyl tRNA synthetase complex-interacting multifunctional protein 2(Aimp2)	5	0.000128688	0.1062	35337.2
Q8R2P8	lysyl-tRNA synthetase(Kars)	12	0.000158386	0.125	71227.4
Q8R5A3	amyloid beta (A4) precursor protein-binding, family B, member 1 interacting protein(Apbb1ip)	4	4.92e-05	0.0731	74254.3
Q91V04	translocating chain-associating membrane protein 1(Tram1)	2	4.4e-05	0.0374	42993.8
Q91VA7	isocitrate dehydrogenase 3 (NAD+) beta(Idh3b)	4	8.58e-05	0.0651	42149.6
Q91WS0	CDGSH iron sulfur domain 1(Cisd1)	5	0.000381299	0.1389	12071.1
Q91WV0	down-regulator of transcription 1(Dr1)	1	4.68e-05	0.0739	19400.7
Q91XR9	glutathione peroxidase 4(Gpx4)	7	0.000227875	0.1621	29215.7
Q91YT0	NADH dehydrogenase (ubiquinone) flavoprotein 1(Ndufv1)	13	0.000230751	0.2306	50783.7
Q91Z25	actin related protein 2/3 complex, subunit 1B(Arpc1b)	55	0.00120474	0.4309	41453.7
Q922Q4	pyrroline-5-carboxylate reductase family, member 2(Pycr2)	3	7.72e-05	0.0969	33619.6
Q923L6	eosinophil-associated, ribonuclease A family, member 10(Ear10)	18	0.000950313	0.1346	17600.7
Q99020	heterogeneous nuclear ribonucleoprotein A/B(Hnrnpab)	29	0.000838054	0.3053	30794.2
Q99J99	mercaptopyruvate sulfurtransferase(Mpst)	6	0.000166385	0.1212	32984.5
Q99JB2	stomatin (Epb7.2)-like 2(Stoml2)	3	7e-05	0.0822	38343.2
Q99K85	phosphoserine aminotransferase 1(Psat1)	4	8.9e-05	0.0541	40428.7
Q99KC8	von Willebrand factor A domain containing 5A(Vwa5a)	4	4.15e-05	0.0681	87069.4
Q99KK2	cytidine monophospho-N-acetylneuraminic acid synthetase(Cmas)	5	9.53e-05	0.0532	48009.7
Q99LF4	RNA 2',3'-cyclic phosphate and 5'-OH ligase(Rtcb)	8	0.000130472	0.1109	55195.9
Q99LU0	charged multivesicular body protein 1B(Chmp1b)	2	8.28e-05	0.0754	22092.1
Q99ME9	GTP binding protein 4(Gtpbp4)	3	3.9e-05	0.03	74047.9
Q99N15	hydroxysteroid (17-beta) dehydrogenase 10(Hsd17b10)	7	0.00022089	0.2069	27238.6
Q99N69	leupaxin(Lpxn)	3	6.4e-05	0.0285	43431.5
Q99NB9	splicing factor 3b, subunit 1(Sf3b1)	27	0.000170532	0.1687	145706
Q9CPP6	NADH dehydrogenase (ubiquinone) 1 alpha subcomplex, 5(Ndufa5)	1	7.1e-05	0.1379	13333.2
Q9CPQ8	ATP synthase, H+ transporting, mitochondrial F0 complex, subunit G(Atp5l)	11	0.000879578	0.2816	11399.2
Q9CQ62	2,4-dienoyl CoA reductase 1, mitochondrial(Decr1)	1	2.46e-05	0.0657	36172.7
Q9CQ92	fission, mitochondrial 1(Fis1)	10	0.000541845	0.2368	16980
Q9CQA3	succinate dehydrogenase complex, subunit B, iron sulfur (Ip)(Sdhb)	5	0.000146029	0.156	31774.9
Q9CQM9	glutaredoxin 3(Glrx3)	12	0.000293272	0.1988	37736.4
Q9CQN1	TNF receptor-associated protein 1(Trap1)	7	8.17e-05	0.0836	80140.5
Q9CQW2	ADP-ribosylation factor-like 8B(Arl8b)	5	0.000221399	0.2312	21507.1
Q9CWL8	catenin, beta like 1(Ctnnbl1)	4	5.85e-05	0.032	64921.1
Q9CX56	proteasome (prosome, macropain) 26S subunit, non-ATPase, 8(Psmd8)	8	0.000186653	0.0992	39887
Q9CXZ1	NADH dehydrogenase (ubiquinone) Fe-S protein 4(Ndufs4)	5	0.000235316	0.1086	19754.2
Q9D0B0	serine/arginine-rich splicing factor 9(Srsf9)	9	0.000333894	0.1351	25627.4
Q9D172	DNA segment, Chr 10, Johns Hopkins University 81 expressed(D10Jhu81e)	8	0.000247701	0.1992	28054.8
Q9D358	acid phosphatase 1, soluble(Acp1)	6	0.000312761	0.1709	17911.9
Q9D6Y7	methionine sulfoxide reductase A(Msra)	6	0.000212087	0.0944	25953.8
Q9D7G0	phosphoribosyl pyrophosphate synthetase 1(Prps1)	9	0.000233096	0.1918	34793.9
Q9D855	ubiquinol-cytochrome c reductase binding protein(Uqcrb)	5	0.000370993	0.3153	13500.9
Q9D880	translocase of inner mitochondrial membrane 50(Timm50)	6	0.000139989	0.1558	39733.6
Q9D8S4	RNA exonuclease 2(Rexo2)	3	0.000104254	0.0675	26703.6
Q9D8Y7	tumor necrosis factor, alpha-induced protein 8-like 2(Tnfaip8l2)	2	8.95e-05	0.1087	20583.9
Q9DBG3	adaptor-related protein complex 2, beta 1 subunit(Ap2b1)	8	6.93e-05	0.0463	105637
Q9DBH5	lectin, mannose-binding 2(Lman2)	12	0.000276069	0.1955	40386.2
Q9DC51	guanine nucleotide binding protein (G protein), alpha inhibiting 3(Gnai3)	10	0.000232657	0.1638	40494.2
Q9DCE9	interferon gamma induced GTPase(Igtp)	6	0.000116823	0.1111	48444.8
Q9DCF9	signal sequence receptor, gamma(Ssr3)	2	8.9e-05	0.0757	21033.2
Q9DCL9	phosphoribosylaminoimidazole carboxylase (Paics)	3	5.81e-05	0.0635	46958
Q9EP69	SAC1 suppressor of actin mutations 1-like (yeast)(Sacm1l)	3	4.21e-05	0.0341	66882.9
Q9EQP2	EH-domain containing 4(Ehd4)	2	3.04e-05	0.0444	61423.4
Q9ERK4	chromosome segregation 1-like (S. cerevisiae)(Cse1l)	18	0.000152676	0.0968	110366
Q9JII5	DAZ associated protein 1(Dazap1)	11	0.000223144	0.1404	43169
Q9JKV1	adhesion regulating molecule 1(Adrm1)	3	6.07e-05	0.0885	42015.7
Q9JLI8	squamous cell carcinoma antigen recognized by T cells 3(Sart3)	5	4.28e-05	0.053	109532
Q9JMG1	endothelial differentiation-related factor 1(Edf1)	2	0.000111298	0.1014	16340.9
Q9QX47	Son DNA binding protein(Son)	3	1.16e-05	0.0103	229858
Q9QXS1	plectin(Plec)	5	8.78e-06	0.0156	533843
Q9QY76	vesicle-associated membrane protein, associated protein B and C(Vapb)	4	0.000135573	0.1029	26911
Q9QY81	nucleoporin 210(Nup210)	26	0.00011354	0.0806	203955
Q9QZD9	eukaryotic translation initiation factor 3, subunit I(Eif3i)	13	0.000329442	0.1908	36419.6
Q9R1C7	pre-mRNA processing factor 40A(Prpf40a)	2	1.73e-05	0.0273	108394
Q9WTP6	adenylate kinase 2(Ak2)	8	0.000284002	0.2198	25571.2
Q9WTP7	adenylate kinase 3(Ak3)	5	0.000181411	0.1101	25392.5
Q9WUA3	phosphofructokinase, platelet(Pfkp)	7	7.35e-05	0.0714	85382.3
Q9WUK4	replication factor C (activator 1) 2(Rfc2)	3	7.08e-05	0.0745	38681.9
Q9WUM4	coronin, actin binding protein 1C(Coro1c)	20	0.000347513	0.1561	53069
Q9WUP7	ubiquitin carboxyl-terminal esterase L5(Uchl5)	4	0.000100134	0.0851	37575.1
Q9WV80	sorting nexin 1(Snx1)	5	7.89e-05	0.0402	58897.6
Q9Z199	suppressor of Ty 4B(Supt4b)	3	0.000211181	0.1966	13167.5
Q9Z1R9	protease, serine 1 (trypsin 1)(Prss1)	3	0.00010044	0.0813	26099.8
Q9Z1Z0	USO1 vesicle docking factor(Uso1)	3	2.58e-05	0.024	106899
Q9Z2E1	methyl-CpG binding domain protein 2(Mbd2)	2	3.98e-05	0.058	43456
S4R2M7	phosphoglycerate kinase 1(Pgk1)	30	0.000968947	0.4314	27679.5
Z4YKB8	heterochromatin protein 1, binding protein 3(Hp1bp3)	49	0.000728459	0.3032	60795.1
Proteins exclusively identified in mice spleen cells in the control (non-infected) condition
P97369	neutrophil cytosolic factor 4(Ncf4)	2	4.4e-05	0.0472	38664.9
Q3UGR5	haloacid dehalogenase-like hydrolase domain containing 2(Hdhd2)	4	0.000115277	0.0811	28694.1
Q9JHI5	isovaleryl coenzyme A dehydrogenase(Ivd)	6	0.000105626	0.0778	46277.9
Q3U0D7	ADP-ribosylation factor 6(Arf6)	2	8.53e-05	0.12	20051.4
P01887	beta-2 microglobulin(B2m)	6	0.000376347	0.1597	13751.9
P25911	LYN proto-oncogene, Src family tyrosine kinase(Lyn)	3	4.56e-05	0.053	56231.4
Q8BGD9	eukaryotic translation initiation factor 4B(Eif4b)	8	9.77e-05	0.1064	68781.1
Q9QZE5	coatomer protein complex, subunit gamma 1(Copg1)	3	2.56e-05	0.0343	97432.4
Q9D0I9	arginyl-tRNA synthetase(Rars)	13	0.000147022	0.1091	75607.1
Q9D0M0	exosome component 7(Exosc7)	3	7.7e-05	0.1271	31787.1
Q62426	cystatin B(Cstb)	5	0.000380827	0.3265	11020.5
Q497K3	small nuclear ribonucleoprotein polypeptide F(Snrpf)	5	0.000433965	0.2442	9700.8
Q9Z2I8	succinate-Coenzyme A ligase, GDP-forming, beta subunit(Suclg2)	8	0.000137907	0.164	46792.7
Q99LC3	NADH dehydrogenase (ubiquinone) 1 alpha subcomplex 10(Ndufa10)	8	0.000168207	0.1915	40559.7
Q8BH69	selenophosphate synthetase 1(Sephs1)	4	7.62e-05	0.0689	42860.7
Q8VE70	programmed cell death 10(Pdcd10)	4	0.000140834	0.1038	24681.8
Q8CG72	ADP-ribosylhydrolase like 2(Adprhl2)	3	6.05e-05	0.0757	39371.4
Q62048	phosphoprotein enriched in astrocytes 15A(Pea15a)	3	0.000172251	0.2077	15026.8
Q80U16	family with sequence similarity 65, member B(Fam65b)	6	4.15e-05	0.0297	118878
P23780	galactosidase, beta 1(Glb1)	4	4.61e-05	0.0696	73056.2
Q3TA96	lysosomal-associated membrane protein 1(Lamp1)	2	3.68e-05	0.0296	43819.3
P13634	carbonic anhydrase 1(Car1)	5	0.000142992	0.1609	28295.2
E9QJT5	acylphosphatase 1, erythrocyte (common) type(Acyp1)	9	0.000427884	0.3567	17315
Q91YR9	prostaglandin reductase 1(Ptgr1)	4	9.08e-05	0.1003	35519.2
P15105	glutamate-ammonia ligase (glutamine synthetase)(Glul)	2	4e-05	0.067	42074.2
E9PV22	leucine rich repeat containing 47(Lrrc47)	3	3.71e-05	0.0498	65845
E9Q317	Sin3-associated polypeptide 18(Sap18)	10	0.000433965	0.2151	19556.1
Q5HZI6	tissue specific transplantation antigen P35B(Tsta3)	6	0.000139518	0.0966	35837
Q91V64	isochorismatase domain containing 1(Isoc1)	3	7.54e-05	0.0875	31994
A2AH25	Rho GTPase activating protein 1(Arhgap1)	5	7.79e-05	0.0376	54385.1
Q8VDP6	CDP-diacylglycerol--inositol 3-phosphatidyltransferase (phosphatidylinositol synthase)(Cdipt)	5	0.000175216	0.0986	23565.2
Q9CQT1	methylthioribose-1-phosphate isomerase 1(Mri1)	3	6.07e-05	0.0623	39368.3
Q9R112	sulfide quinone reductase-like (yeast)(Sqrdl)	4	6.63e-05	0.0889	50231.9
Q9CPW3	mitochondrial ribosomal protein L54(Mrpl54)	2	0.000110581	0.0593	15394.2
A0A0G2JEK2	cysteine-rich protein 1 (intestinal)(Crip1)	9	0.000524827	0.1406	13554.3
Q544R1	proline synthetase co-transcribed(Prosc)	1	2.72e-05	0.0584	30011.5
Q059T9	pre-mRNA processing factor 4(Prpf4)	2	2.87e-05	0.0269	58315.3
B2RXR6	ankyrin repeat domain 44(Ankrd44)	8	6.01e-05	0.0453	107299
P38060	3-hydroxy-3-methylglutaryl-Coenzyme A lyase(Hmgcl)	5	0.000114834	0.1815	34198.7
P48428	tubulin cofactor A(Tbca)	2	0.000138226	0.2593	12731.6
Q9QZE7	translin-associated factor X(Tsnax)	4	0.000102955	0.1069	32887.7
B2RXY7	carbonyl reductase 1(Cbr1)	11	0.000296413	0.1949	30604
Q9ERU3	zinc finger protein 422(Zfp422)	7	0.000220462	0.1013	27259
Q80ZZ0	EH-domain containing 1(Ehd1)	3	4.19e-05	0.0637	60546.6
Q7JCY6	NADH dehydrogenase subunit 4(ND4)	2	3.25e-05	0.0218	51828.6
Q9D8M4	ribosomal protein L7-like 1(Rpl7l1)	1	3.03e-05	0.065	28507.8
Q6NSR8	aminopeptidase-like 1(Npepl1)	2	2.85e-05	0.0668	55886.4
Q80VD1	family with sequence similarity 98, member B(Fam98b)	3	5.22e-05	0.0536	45302.8
Q9D7N9	adipocyte plasma membrane associated protein(Apmap)	3	5.4e-05	0.0723	46386.7
Q02819	nucleobindin 1(Nucb1)	2	3.25e-05	0.0588	53357.9
Q9DCW5	cytochrome c oxidase subunit VIa polypeptide 1(Cox6a1)	2	0.000133289	0.1339	12457.3
Q8BNW9	kelch repeat and BTB (POZ) domain containing 11(Kbtbd11)	3	3.54e-05	0.0348	67885.6
Q9D1D4	transmembrane p24 trafficking protein 10(Tmed10)	5	0.000170416	0.1461	24876.9
Q9D0R2	threonyl-tRNA synthetase(Tars)	2	2.07e-05	0.036	83284.8
P50295	N-acetyltransferase 2 (arylamine N-acetyltransferase)(Nat2)	3	7.72e-05	0.0414	33662.1
O54890	integrin beta 3(Itgb3)	2	1.9e-05	0.0292	86663.3
B1ARJ9	CD79B antigen(Cd79b)	4	0.00010367	0.0486	32095.4
Q61425	hydroxyacyl-Coenzyme A dehydrogenase(Hadh)	6	0.000142628	0.0637	34423.9
O09111	NADH dehydrogenase (ubiquinone) 1 beta subcomplex, 11(Ndufb11)	1	4.94e-05	0.0662	17414.6
Q9DAK9	phosphohistidine phosphatase 1(Phpt1)	4	0.000240781	0.1935	13969.7
Q9DCE5	PAK1 interacting protein 1(Pak1ip1)	3	5.86e-05	0.0576	42071.4
Q99L27	guanosine monophosphate reductase 2(Gmpr2)	1	2.14e-05	0.0345	37976
P97450	ATP synthase, H+ transporting, mitochondrial F0 complex, subunit F(Atp5j)	6	0.000414678	0.3704	12470.6
Q8BLF1	neutral cholesterol ester hydrolase 1(Nceh1)	2	3.66e-05	0.0392	45692.6
P63166	small ubiquitin-like modifier 1(Sumo1)	6	0.000443418	0.1881	11531.7
Q9CZU3	superkiller viralicidic activity 2-like 2 (S. cerevisiae)(Skiv2l2)	5	3.59e-05	0.0433	117543
Q8BMS9	Ras association (RalGDS/AF-6) domain family member 2(Rassf2)	7	0.000160274	0.138	37931.5
Q8BMF4	dihydrolipoamide S-acetyltransferase (E2 component of pyruvate dehydrogenase complex)(Dlat)	8	9.3e-05	0.0857	67880.7
O35405	phospholipase D family, member 3(Pld3)	7	0.000107069	0.0922	54336.4
O88271	craniofacial development protein 1(Cfdp1)	5	0.000126512	0.0881	32883.4
P13379	CD5 antigen(Cd5)	7	0.000105768	0.1296	53796.8
B2RV77	predicted gene 5483(Gm5483)	4	0.000307802	0.299	10940.6
Q99LY9	NADH dehydrogenase (ubiquinone) Fe-S protein 5(Ndufs5)	4	0.000281668	0.1792	12621.3
P28271	aconitase 1(Aco1)	9	7.56e-05	0.0911	98045.4
Q9CQQ8	LSM7 homolog, U6 small nuclear RNA and mRNA degradation associated(Lsm7)	5	0.00036234	0.1553	11610.9
Q8K1I7	WAS/WASL interacting protein family, member 1(Wipf1)	10	0.000151404	0.0974	50031.8
Q9CQ65	methylthioadenosine phosphorylase(Mtap)	4	0.000105501	0.1237	31023.7
Q542P8	EMG1 N1-specific pseudouridine methyltransferase(Emg1)	3	9.18e-05	0.0574	26939.1
Q9CPT4	myeloid derived growth factor(Mydgf)	4	0.00017986	0.0904	17953
Q99J36	THUMP domain containing 1(Thumpd1)	5	0.000106632	0.0657	38842.7
Q8BGS2	bolA-like 2 (E. coli)(Bola2)	1	8.68e-05	0.1047	10190.2
Q9CT10	RAN binding protein 3(Ranbp3)	2	3.04e-05	0.0244	52522.7
A2A6J4	lymphocyte specific 1(Lsp1)	43	0.000996773	0.4565	35723.7
F6ZN61	Rho guanine nucleotide exchange factor (GEF) 1(Arhgef1)	20	0.000242344	0.2159	68935.9
F6Z2C0	filamin, alpha(Flna)	14	0.000371882	0.3132	30331.5
A0A087WS46	eukaryotic translation elongation factor 1 beta 2(Eef1b2)	10	0.000405663	0.2011	20106
Q7TSG6	radixin(Rdx)	47	0.000901845	0.1928	46320.1
E9PYU4	chromodomain helicase DNA binding protein 5(Chd5)	12	4.68e-05	0.0298	218798
F6WR45	chromodomain helicase DNA binding protein 4(Chd4)	6	0.000100868	0.0721	50256
P42669	purine rich element binding protein A(Pura)	7	0.000162771	0.1277	34844.4
P16125	lactate dehydrogenase B(Ldhb)	10	0.000223479	0.1108	36531
A0A0R4J1B4	integrin alpha M(Itgam)	26	0.000187326	0.1593	115036
E9Q2W9	actinin alpha 4(Actn4)	56	0.000806941	0.444	59842.1
E9QP00	transformer 2 alpha homolog (Drosophila)(Tra2a)	5	0.000132344	0.0816	32541
A0A075B5P2	immunoglobulin kappa constant(Igkc)	11	0.000767348	0.4112	11865.6
H3BL37	treacle ribosome biogenesis factor 1(Tcof1)	34	0.000187156	0.1431	138456
A0A0R4J064	ADP-dependent glucokinase(Adpgk)	8	0.00012039	0.123	53864.5
Q99JY3	GTPase, IMAP family member 4(Gimap4)	44	0.00149966	0.4749	24520.5
B2RSH2	guanine nucleotide binding protein (G protein), alpha inhibiting 1(Gnai1)	12	0.000253024	0.0593	40317.2
D6RCW7	capping protein (actin filament) muscle Z-line, alpha 2(Capza2)	27	0.00115824	0.5057	19964.8
H7BWX9	small ubiquitin-like modifier 2(Sumo2)	10	0.00140834	0.3396	5992.1
Q3TEA8	heterochromatin protein 1, binding protein 3(Hp1bp3)	41	0.000552405	0.2545	60811.1
P21958	transporter 1, ATP-binding cassette, sub-family B (MDR/TAP)(Tap1)	12	0.000123716	0.1754	78795.9
E9QL13	RNA binding motif protein 14(Rbm14)	13	0.000158037	0.1221	62617.7
Q9JIX8	apoptotic chromatin condensation inducer 1(Acin1)	10	5.58e-05	0.0665	150611
A2AD85	serine/threonine kinase 26(Stk26)	6	0.000107657	0.1274	46566.6
P11087	collagen, type I, alpha 1(Col1a1)	4	2.05e-05	0.0213	137930
S4R1F2	annexin A4(Anxa4)	3	0.000114248	0.1582	21836
P63168	dynein light chain LC8-type 1(Dynll1)	8	0.00067094	0.3708	10341.1
G3UXL2	phosphoribosyl pyrophosphate synthetase 1-like 3(Prps1l3)	8	0.000187779	0.0849	34783.9
Q9D0K2	3-oxoacid CoA transferase 1(Oxct1)	8	0.000114834	0.1538	55935
E9Q4E5	hematopoietic cell specific Lyn substrate 1(Hcls1)	19	0.000984861	0.4861	15938.8
E9Q8Y1	DEK oncogene (DNA binding)(Dek)	14	0.000517321	0.2723	23015.7
E9QK48	echinoderm microtubule associated protein like 2(Eml2)	3	2.66e-05	0.0511	90717.3
D6RGM3	echinoderm microtubule associated protein like 2(Eml2)	2	3.5e-05	0.0328	46698.6
P08556	neuroblastoma ras oncogene(Nras)	11	0.000434425	0.1799	21167.5
A0A0G2JDL9	RAS-related protein-1a(Rap1a)	30	0.00189768	0.4322	13399.1
Q61411	Harvey rat sarcoma virus oncogene(Hras)	11	0.000434425	0.1164	21266.5
A0A0A6YWC8	vimentin(Vim)	118	0.00206271	0.6417	49144.7
Q3UIA2	Rho GTPase activating protein 17(Arhgap17)	2	1.76e-05	0.0154	92126.8
A0A0G2JDF1	serrate RNA effector molecule homolog (Arabidopsis)(Srrt)	4	0.000124924	0.0418	26646.5
Q91YP3	deoxyribose-phosphate aldolase (putative)(Dera)	1	2.35e-05	0.0377	34935.3
Q8VCI0	phospholipase B domain containing 1(Plbd1)	11	0.000149284	0.1618	62939.7
F7BTZ2	promyelocytic leukemia(Pml)	32	0.000413243	0.301	64556.1
Q9CPX4	ferritin light polypeptide 1(Ftl1)	10	0.00040788	0.2951	20741.5
Q3U4Y3	CD3 antigen, gamma polypeptide(Cd3g)	5	0.000205061	0.1264	20203.5
Q9QZM0	ubiquilin 2(Ubqln2)	6	7.02e-05	0.0878	67290.3
Q99MN1	lysyl-tRNA synthetase(Kars)	8	0.000100359	0.1025	67778.5
Q3THS6	methionine adenosyltransferase II, alpha(Mat2a)	3	5.67e-05	0.0506	43643.4
Q9QZ88	VPS29 retromer complex component(Vps29)	3	0.00012039	0.0968	20885.9
Q61316	heat shock protein 4(Hspa4)	39	0.00034614	0.2771	94055.3
Q8R029	H2A histone family, member V(H2afv)	86	0.00713246	0.3444	9351.3
Q5SVG5	adaptor protein complex AP-1, beta 1 subunit(Ap1b1)	10	8.15e-05	0.0666	101110
H3BJS9	heterogeneous nuclear ribonucleoprotein K(Hnrnpk)	16	0.00137273	0.5632	9590.1
A2AL12	heterogeneous nuclear ribonucleoprotein A3(Hnrnpa3)	66	0.00154918	0.4057	34436.5
V9GX38	heterogeneous nuclear ribonucleoprotein A3 pseudogene(Gm17190)	10	0.000209081	0.0364	37684.9
P57776	eukaryotic translation elongation factor 1 delta (guanine nucleotide exchange protein)(Eef1d)	16	0.00018095	0.1273	72868.5
H3BJB6	chaperonin containing Tcp1, subunit 8 (theta)(Cct8)	13	0.000406003	0.251	25895.3
H3BL49	chaperonin containing Tcp1, subunit 8 (theta)(Cct8)	31	0.000473191	0.2986	53031.2
P10630	eukaryotic translation initiation factor 4A2(Eif4a2)	26	0.00047566	0.2034	46441.8
F6YJW4	ribosomal protein L18A pseudogene(Gm17541)	9	0.00038608	0.1494	20446.6
D3YUM1	NADH dehydrogenase (ubiquinone) flavoprotein 1(Ndufv1)	14	0.000229668	0.1868	49863.2
Q99MD9	nuclear autoantigenic sperm protein (histone-binding)(Nasp)	9	8.69e-05	0.0944	83884.7
G3X9W0	heterogeneous nuclear ribonucleoprotein D(Hnrnpd)	31	0.000688662	0.2798	36167.3
G3UY42	poly(A) binding protein, nuclear 1(Pabpn1)	6	0.000140393	0.2759	33964.7
P51125	calpastatin(Cast)	6	6.05e-05	0.077	79629.1
A0A140T8V3	voltage-dependent anion channel 3, pseudogene 1(Vdac3-ps1)	22	0.000580256	0.3145	30658.3
P55264	adenosine kinase(Adk)	5	0.000103382	0.108	40105.5
Q62159	ras homolog family member C(Rhoc)	32	0.00123759	0.4352	21974.2
D3YVJ7	aldo-keto reductase family 1, member B3 (aldose reductase)(Akr1b3)	17	0.000720974	0.2102	19629.9
Q8K183	pyridoxal (pyridoxine, vitamin B6) kinase(Pdxk)	7	0.000167466	0.1891	34974.6
P61082	ubiquitin-conjugating enzyme E2M(Ube2m)	7	0.000285516	0.2459	20868.6
Q8R050	G1 to S phase transition 1(Gspt1)	4	4.7e-05	0.0535	68464.8
Q8BHJ5	transducin (beta)-like 1X-linked receptor 1(Tbl1xr1)	2	2.9e-05	0.0603	55608.1
A0A087WNZ5	lymphocyte antigen 6 complex, locus C1(Ly6c1)	1	5.08e-05	0.1224	15995.7
E9Q0C1	SH3-domain kinase binding protein 1(Sh3kbp1)	19	0.00031727	0.2036	49335.4
A0A075B6A0	immunoglobulin heavy constant mu(Ighm)	59	0.000925185	0.3634	52560.7
P01881	immunoglobulin heavy constant delta(Ighd)	7	0.000203305	0.1401	28332.3
O88958	glucosamine-6-phosphate deaminase 1(Gnpda1)	3	7.75e-05	0.1419	32510.4
F7CFA5	glutamate dehydrogenase 1(Glud1)	15	0.000777521	0.4722	15468.9
D3Z5N6	D4, zinc and double PHD fingers family 2(Dpf2)	4	7.37e-05	0.0765	45807.1
Q3UHW9	cofilin 2, muscle(Cfl2)	17	0.000764407	0.1446	18679.8
Q8CGP0	histone cluster 3, H2bb, pseudogene(Hist3h2bb-ps)	277	0.0164094	0.5238	13881.5
Q6PDM2	serine/arginine-rich splicing factor 1(Srsf1)	62	0.00236113	0.5765	21775.8
Q01965	lymphocyte antigen 9(Ly9)	4	4.57e-05	0.0489	73078.4
S4R223	ribosomal protein S19(Rps19)	12	0.00124403	0.4444	8077.2
H3BKN0	NOL1/NOP2/Sun domain family member 2(Nsun2)	8	8.27e-05	0.09	81304.1
A0A0J9YUI1	ubiquitin-conjugating enzyme E2K(Ube2k)	7	0.000375895	0.1583	15782.1
Q61207	prosaposin(Psap)	12	0.000160809	0.1095	61363.3
A2AWT7	upstream binding transcription factor, RNA polymerase I(Ubtf)	11	0.000109184	0.1117	88312.7
Q91ZA3	propionyl-Coenzyme A carboxylase, alpha polypeptide(Pcca)	4	4.12e-05	0.0456	79853.1
Q9DCS9	NADH dehydrogenase (ubiquinone) 1 beta subcomplex, 10(Ndufb10)	4	0.000169641	0.1818	20992.4
Q01147	cAMP responsive element binding protein 1(Creb1)	3	6.57e-05	0.0411	36633.6
A2AGN7	proteasome (prosome, macropain) 26S subunit, ATPase 3(Psmc3)	11	0.000205266	0.1525	44622.9
P11672	lipocalin 2(Lcn2)	14	0.000522494	0.23	22842.5
Q569Z6	thyroid hormone receptor associated protein 3(Thrap3)	6	4.71e-05	0.0547	108096
Q5NCI4	phosphoglycerate mutase 2(Pgam2)	6	0.000177017	0.0791	28790.8
Q561M1	acid phosphatase 1, soluble(Acp1)	4	0.000188967	0.1266	17892.8
Q8BJU0	small glutamine-rich tetratricopeptide repeat (TPR)-containing, alpha(Sgta)	6	0.000142175	0.127	34282.9
Q91V61	sideroflexin 3(Sfxn3)	6	0.000139518	0.1682	35365.5
Q8VBV3	exosome component 2(Exosc2)	4	0.0001019	0.0887	32593
Q9Z1X4	interleukin enhancer binding factor 3(Ilf3)	9	7.37e-05	0.0593	97687.3
Q9CXI5	mesencephalic astrocyte-derived neurotrophic factor(Manf)	3	0.000125098	0.095	20342.5
A2AE89	glutathione S-transferase, mu 1(Gstm1)	5	0.000152955	0.1885	28519.5
Q64521	glycerol phosphate dehydrogenase 2, mitochondrial(Gpd2)	7	7.19e-05	0.0894	80884.5
G3X8X6	sialic acid binding Ig-like lectin 1, sialoadhesin(Siglec1)	3	1.32e-05	0.0082	183443
Q3UUV5	src family associated phosphoprotein 1(Skap1)	1	2.1e-05	0.0366	40918.3
A0A0U1RQ71	ribosomal protein S13(Rps13)	4	0.000563336	0.1887	5851.1
Q9Z2U1	proteasome (prosome, macropain) subunit, alpha type 5(Psma5)	16	0.000495549	0.3029	26376.2
Q3U4W8	ubiquitin specific peptidase 5 (isopeptidase T)(Usp5)	13	0.000116209	0.0707	93277.4
F6V2E8	topoisomerase (DNA) II beta(Top2b)	4	0.000166798	0.0615	20561.7
A0A0R4J1I6	nucleoporin 210(Nup210)	27	0.00010941	0.0901	199344
P51174	acyl-Coenzyme A dehydrogenase, long-chain(Acadl)	21	0.000364531	0.1884	47859.5
Q9CYI4	Luc7-like(Luc7l)	9	0.000181072	0.1186	43889.4
Q8BFR5	Tu translation elongation factor, mitochondrial(Tufm)	28	0.000462384	0.2854	49459
O70370	cathepsin S(Ctss)	6	0.000131721	0.1794	38431.4
Q8CFZ0	ubiquitin-conjugating enzyme E2I(Ube2i)	17	0.00125635	0.3267	11199.6
P11835	integrin beta 2(Itgb2)	37	0.000358204	0.3333	84952
P01027	complement component 3(C3)	12	5.39e-05	0.0577	186348
P51859	hepatoma-derived growth factor(Hdgf)	26	0.000818858	0.6371	26234.6
A2BI12	PC4 and SFRS1 interacting protein 1(Psip1)	18	0.000410874	0.2049	36927.9
P26369	U2 small nuclear ribonucleoprotein auxiliary factor (U2AF) 2(U2af2)	12	0.000188569	0.1453	53465.2
A0A023T672	RNA binding motif protein 8a(Rbm8a)	9	0.00038608	0.2184	19858.7
E9Q3T0	ribosomal protein, large, P1 pseudogene(Gm10073)	9	0.000589279	0.5175	11407.7
Q91XH5	sepiapterin reductase(Spr)	5	0.000142447	0.1069	27892.4
G3UZW8	proteasome (prosome, macropain) subunit, beta type 8 (large multifunctional peptidase 7)(Psmb8)	11	0.000331074	0.1613	26965
Q920B9	suppressor of Ty 16(Supt16)	17	0.000121195	0.0974	119731
Q20BD0	heterogeneous nuclear ribonucleoprotein A/B(Hnrnpab)	24	0.000539581	0.262	36170.4
Q9CRB9	coiled-coil-helix-coiled-coil-helix domain containing 3(Chchd3)	6	0.000197292	0.1894	26300.2
Q91V92	ATP citrate lyase(Acly)	8	5.47e-05	0.0605	119633
Q3U1N3	related RAS viral (r-ras) oncogene(Rras)	3	0.000102718	0.0505	23731
Q9CQQ7	ATP synthase, H+ transporting, mitochondrial F0 complex, subunit B1(Atp5f1)	11	0.000320728	0.1602	28912.4
Q3UGB5	DAZ associated protein 1(Dazap1)	10	0.000183847	0.1823	43111.9
Q3TCN2	phospholipase B domain containing 2(Plbd2)	1	1.26e-05	0.0202	66229.2
B0QZL1	enolase 1, alpha non-neuron(Eno1)	78	0.00263443	0.6335	23902.4
P21550	enolase 3, beta muscle(Eno3)	32	0.000550356	0.1728	46977.3
F6YVP7	ribosomal protein S18 pseudogene(Gm10260)	29	0.00142409	0.4934	17642.8
Q5SX49	profilin 1(Pfn1)	83	0.00553151	0.6518	11794.8
O08709	peroxiredoxin 6(Prdx6)	38	0.00126625	0.5893	24837
G5E866	splicing factor 3b, subunit 1(Sf3b1)	28	0.000160274	0.1518	145720
Q922V4	pleiotropic regulator 1(Plrg1)	4	5.82e-05	0.1014	56884
A2AFQ2	hydroxysteroid (17-beta) dehydrogenase 10(Hsd17b10)	10	0.000275432	0.2362	28338.2
G3X987	GTPase, IMAP family member 9(Gimap9)	5	0.000128251	0.1478	33259.1
Q8K558	triggering receptor expressed on myeloid cells-like 1(Treml1)	2	4.64e-05	0.0404	34142.4
Q99LB6	methionine adenosyltransferase II, beta(Mat2b)	7	0.000156435	0.1377	37351
Q3V2J0	family with sequence similarity 92, member B(Fam92b)	5	0.000127812	0.0411	33235.9
B1AT82	phosphoribosyl pyrophosphate synthetase-associated protein 1(Prpsap1)	6	0.000116325	0.1325	42422.4
Q8R574	phosphoribosyl pyrophosphate synthetase-associated protein 2(Prpsap2)	6	0.000121369	0.1572	40836.3
F7A8H6	glutathione peroxidase 4(Gpx4)	10	0.000295028	0.1542	29109.7
A0A140LJ68	protein arginine N-methyltransferase 1(Prmt1)	6	0.000367092	0.2295	14121.7
P11103	poly (ADP-ribose) polymerase family, member 1(Parp1)	44	0.00032421	0.2024	113010
P09602	high mobility group nucleosomal binding domain 2(Hmgn2)	7	0.000580549	0.3778	9399.1
E9Q2Z4	predicted gene 16494(Gm16494)	10	0.000857955	0.3103	9287.9
F7AA45	RNA binding motif protein 39(Rbm39)	12	0.000288008	0.1961	33902.1
A2A6F8	ribosomal protein L23(Rpl23)	10	0.00124403	0.4667	6190.5
Q9WV32	actin related protein 2/3 complex, subunit 1B(Arpc1b)	51	0.00102332	0.4328	41019.4
Q8CFQ1	signal transducer and activator of transcription 1(Stat1)	9	0.000276452	0.2058	27631.7
O88890	SH2 domain containing 1A(Sh2d1a)	2	0.000118479	0.2937	13877.1
Q8C0C7	phenylalanyl-tRNA synthetase, alpha subunit(Farsa)	4	5.88e-05	0.0492	57544.7
H3BIV7	protein phosphatase 2, regulatory subunit A, beta(Ppp2r1b)	14	0.000220462	0.0907	51886.2
Q6ZWU9	ribosomal protein S27(Rps27)	5	0.000444298	0.2381	9436.8
E9QPX3	NADH dehydrogenase (ubiquinone) Fe-S protein 4(Ndufs4)	7	0.000298568	0.2286	19772.1
Q8BIJ6	isoleucine-tRNA synthetase 2, mitochondrial(Iars2)	2	1.48e-05	0.0168	112714
O35691	pinin(Pnn)	6	6.18e-05	0.0372	82368.3
Q9CQB4	ubiquinol-cytochrome c reductase binding protein(Uqcrb)	5	0.000336225	0.1351	13534.9
A0A087WNT1	transcription elongation factor B (SIII), polypeptide 1(Tceb1)	4	0.000222812	0.3209	14912.1
A0A0R4J0V5	polymerase (RNA) II (DNA directed) polypeptide A(Polr2a)	7	2.7e-05	0.0212	213328
B1AR69	myosin, heavy polypeptide 13, skeletal muscle(Myh13)	5	1.93e-05	0.0046	223404
D3YVH7	proliferation-associated 2G4(Pa2g4)	18	0.000488566	0.2691	30669.5
A0A140T8M7	ribosomal protein L23A, pseudogene 3(Rpl23a-ps3)	12	0.00057417	0.2115	17669.1
O55131	septin 7(Sept7)	24	0.000410874	0.2752	50499.9
F6Q3W0	WD repeat domain 5(Wdr5)	4	0.000106252	0.0925	31089.6
B2RR03	glycoprotein Ib, beta polypeptide(Gp1bb)	3	0.000104638	0.0514	22474.3
Q9D020	5'-nucleotidase, cytosolic III(Nt5c3)	3	6.77e-05	0.0755	37210.4
P16110	lectin, galactose binding, soluble 3(Lgals3)	7	0.000197915	0.1439	27479.5
A0A0A6YW82	ubiquinol-cytochrome c reductase core protein 1(Uqcrc1)	11	0.000429876	0.2618	20776.4
A0A140T8V5	proliferating cell nuclear antigen pseudogene 2(Pcna-ps2)	12	0.000343182	0.272	28748.3
F6YY69	tyrosine 3-monooxygenase/tryptophan 5-monooxygenase activation protein, theta polypeptide(Ywhaq)	38	0.000995227	0.3579	32296.5
Q4KL81	actin, gamma, cytoplasmic 1(Actg1)	584	0.0116243	0.7573	41747.8
P68033	actin, alpha, cardiac muscle 1(Actc1)	307	0.00607828	0.4032	41973.9
A0A0U1RQ96	actin, gamma 2, smooth muscle, enteric(Actg2)	77	0.0029474	0.1795	22026.1
F6U250	NOP56 ribonucleoprotein(Nop56)	18	0.000995227	0.4	15470.3
